# Supplementary material for: A small-molecule ICMT inhibitor delays senescence of Hutchinson-Gilford progeria syndrome cells
Source: eLife. 2021 Feb 2;10:e63284. doi: 10.7554/eLife.63284 (PMC7853716; doi:10.7554/eLife.63284)
Supplement: Source data 1. [file elife-63284-data1.xlsx]

## Sheet: Sheet1
Figure 1
b	** p=0.0078
d	WT vs LAKI609G/G609G Icmthm/hm n.s. p=0.9905
	WT vs LAKI609G/G609G Icmt+ /+ ** p=0.0021
	LAKI609G/G609G Icmthm/hm vs LAKI609G/G609G Icmt+ /+ * p=0.0118
e	WT vs LAKI609G/G609G Icmthm/hm ** p=0.0043
	WT vs LAKI609G/G609G Icmt+ /+ **** p<0.0001
	LAKI609G/G609G Icmthm/hm vs LAKI609G/G609G Icmt+ /+ *** p=0.002
g	**** p=0.0003
Figure 2
c	ctrl vs C75 ****p<0.0001 Ctrl vs FTI****p<0.0001
d	WT vs Ctrl ****p<0.0001
	C75 vs FTI ****p<0.0001
	Ctrl vs FTI ****p<0.0001
e-g,j	**** p<0.0001
K	C75 vs ctrl ** p=0.0056
	C75 vs C75+lonafarnib **** p<0.0001
l	WT vs Ctrl ****p<0.0001
	Ctrl vs c75* p=0.0105
	WT vs C75 **p=0.0092
m	WT vs Ctrl ****p<0.0001
	Ctrl vs c75** p=0.0015
	WT vs C75 *p=0.0122
n	WT vs Ctrl ****p<0.0001
	Ctrl vs c75*** p=0.0002
	WT vs C75 *p=0.0485
o	WT vs Ctrl **p=0.0014
	Ctrl vs C75 ** p=0.0049
P	WT vs Ctrl * p=0.0223
	ctrl vs C75 * p=0.0409
Figure 3
b	0 vs 1 * p=0.0254
	0 vs5 ** p=0.0014
c	0 vs 5 ** p=0.0019
g	ctrl vs C75 * p=0.0351
h	ctrl vs C75 * p=0.0322
	ctrl vs C75 *** p=0.0007
Figure S2
b,c	****p<0.0001
d	G0 ** p=0.0018
	G1 *** p=0.0005
	S/G2/M *p=0.0219
e	Basal respiration WT vs ctrl *p=0.0229 Ctrl vs C75 *p=0.0294
	Maximun respiration WTvs ctrl *p=0.0105 Ctrl vs C75 * p=0.0171
	ATP WT vs Ctrl ***p=0.0006 Ctrl vs C75 * p=0.0359
f	WT vs ctrl ** p=0.0019 ctrl vs C75 **** p<0.0001
i	WTvs Ctrl ** p=0.0030
	>6 nuclei * p=0.0297
